# Supplementary material
Source: PubMed Central journal article supplement (PMC7970412)
Supplement: NIHMS1676986-supplement-Supplementary_Figures.pdf [file NIHMS1676986-supplement-Supplementary_Figures.pdf]

## Supplementary Materials for

### **Tissue-resident CD8<sup>+</sup> T cells drive age-associated chronic lung sequelae following viral pneumonia**

Nick P. Goplen, Yue Wu, Young Min Son, Chaofan Li, Zheng Wang, In Su Cheon, Li Jiang, Bibo Zhu, Katayoun Ayasoufi, Eduardo N. Chini, Aaron J. Johnson, Robert Vassallo, Andrew H. Limper, Nu Zhang, Jie Sun\*

\*Corresponding author. Email: [sun.jie@mayo.edu](mailto:sun.jie@mayo.edu)

Published 6 November 2020, *Sci. Immunol.* **5**, eabc4557 (2020)

DOI: [10.1126/sciimmunol.abc4557](https://doi.org/10.1126/sciimmunol.abc4557)

#### **The PDF file includes:**

- Fig. S1. Aged lungs exhibit persistent inflammatory responses after influenza infection.
- Fig. S2. Enhanced presence of adaptive immune cells in aged lung parenchyma.
- Fig. S3. Aged parenchymal CD8<sup>+</sup> CD69<sup>+</sup> memory T cells are tissue resident.
- Fig. S4. The accumulation of CD8<sup>+</sup> T<sub>RM</sub> in aged lungs is dependent on TGF-βR signaling.
- Fig. S5. scRNA-seq on D<sup>b</sup>-NP T<sub>RM</sub> from young or aged lungs.
- Fig. S6. High dose of CD8 Ab treatment diminishes lung inflammatory responses.

#### **Other Supplementary Material for this manuscript includes the following:**

(available at [immunology.sciencemag.org/cgi/content/full/5/53/eabc4557/DC1](https://immunology.sciencemag.org/cgi/content/full/5/53/eabc4557/DC1))

Table S1 (Microsoft Excel format). Raw data and statistics for Figs. 1 to 7.

Figure S1

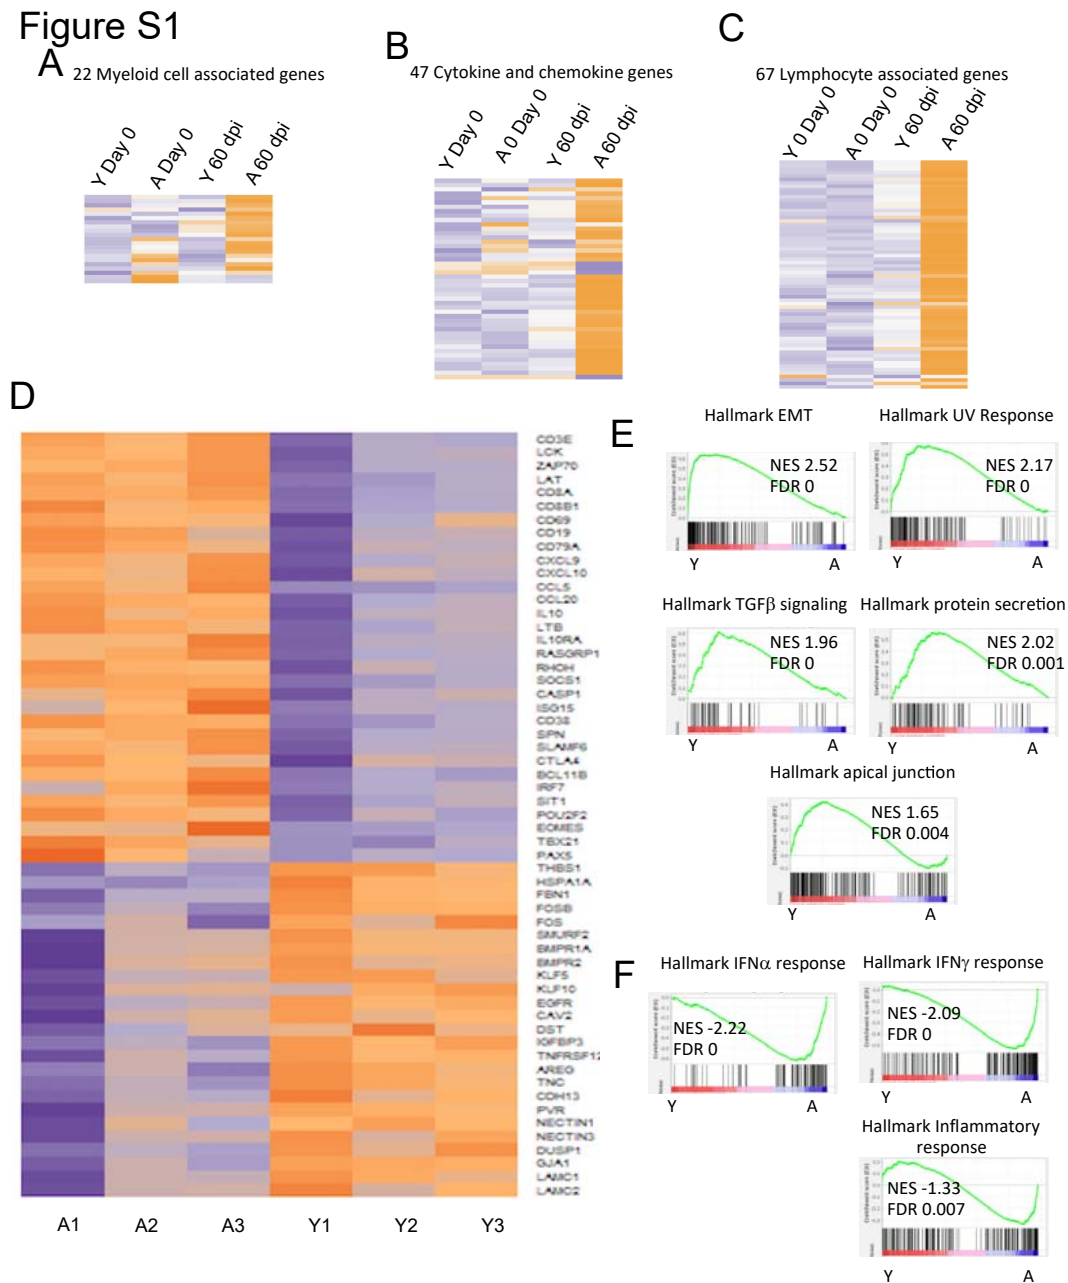

**Fig. S1. Aged lungs exhibit persistent inflammatory responses after influenza infection.**

**A-C.** Young (Y) or aged (A) C57BL/6 mice were infected (day 60) or not (day 0) with PR8. 560 immune-associated genes in the lungs were analyzed by Nanostring (at least 3 pooled samples/group). Myeloid (**A**), cytokine and chemokine (**B**), or lymphocyte (**C**) associated DEGs that were at least 1.5 fold expression level changes from Aged to young infected samples. **(D)** RNAseq heatmap showing DEGs in young or aged infected lungs 60 d.p.i. **E, F.** GSEA plots of RNAseq data showing genes enriched in young infected lungs (**E**) or aged infected lungs (**F**) with associated normalized enrichment scores (NES) and false-discovery rates (FDR). Nanostring

data were representative of 2 experiments with pooled samples. RNAseq data were from a single replicate with samples in triplicate.

Figure S2

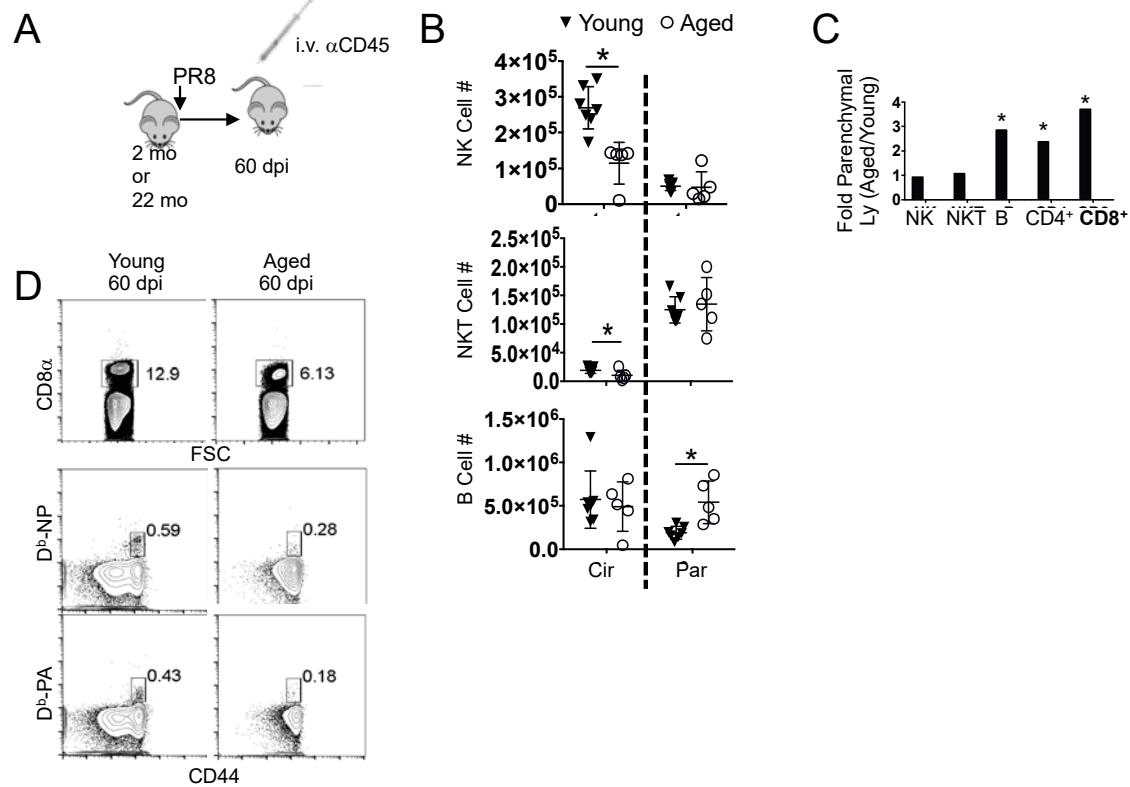

**Fig. S2. Enhanced presence of adaptive immune cells in aged lung parenchyma.** Young or aged C57BL/6 mice were infected with PR8 and injected intravenously (i.v.) with anti-CD45 to label circulating white blood cells prior to sacrifice. **A.** Schematics of experimental procedure. **B.** NK, NKT, and B cells were enumerated in the lung vasculature (Cir) and parenchyma (Par) at 60 d.p.i. **C.** Fold change of aged/young cells in parenchyma with indicated lymphocyte population at 60 d.p.i. **D.** Representative flow cytometry gating of CD8<sup>+</sup> CD44<sup>Hi</sup> D<sup>b</sup>-tetramer<sup>+</sup> NP and PA specific memory T cells in the spleen at 60 d.p.i. **B-D** were representatives of 3 experiments. \*  $p < 0.05$  Student's two-tailed t-test with unequal variance.

Figure S3

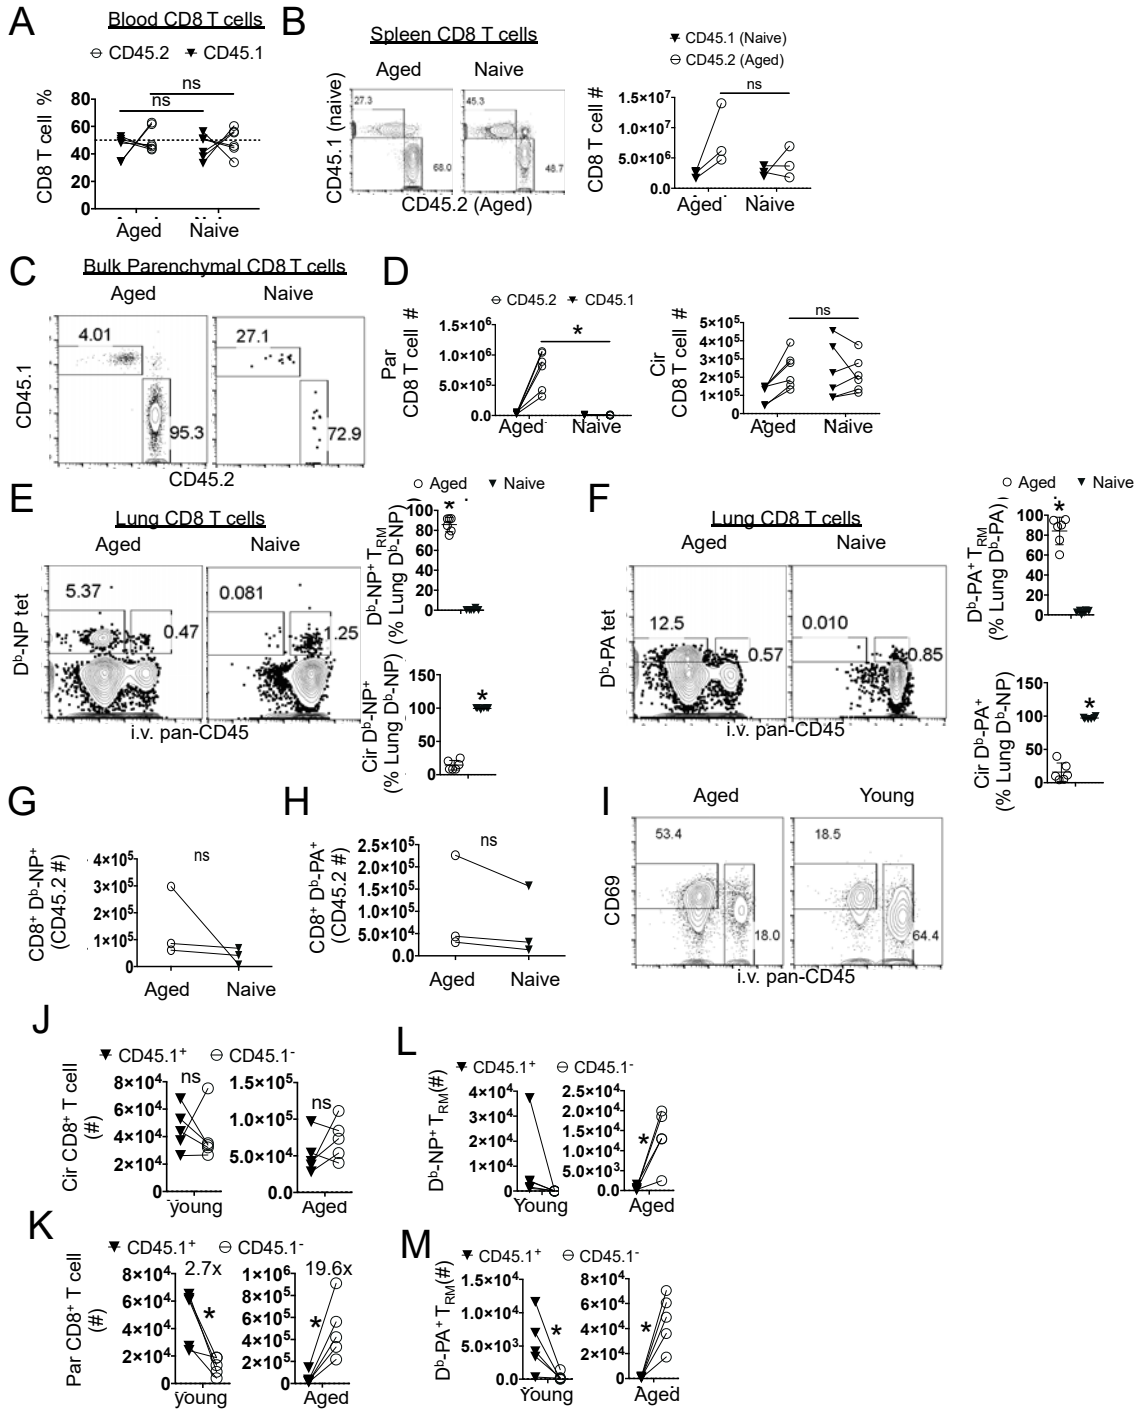

**Fig. S3. Aged parenchymal CD8<sup>+</sup> CD69<sup>+</sup> memory T cells are tissue resident.**

Aged mice (CD45.2<sup>+</sup>) were infected with PR8 and parabiosed with young naive (CD45.1<sup>+</sup>) mice at 5 weeks after infection. **A.** Percent of host or donor CD8<sup>+</sup> T cells in aged or naive hosts where each line represents total CD8<sup>+</sup> T cells in blood from one mouse. **B.** Representative flow plot of total splenic CD8 T cells (left) and enumeration (right) of their host of origin. **C.** Representative flow plot of bulk parenchymal CD8<sup>+</sup> T cells. **D.** Enumeration of source of lung parenchymal (Par; CD69<sup>+</sup>CD8<sup>+</sup> T cells protected from i.v. CD45 labeling) or circulating (Cir) total CD8 T cells. **E.** Representative flow plot showing tetramer staining of D<sup>b</sup>-NP<sup>+</sup> cells (Left) and percentages of total lung D<sup>b</sup>-NP<sup>+</sup> cells found in the parenchyma (top right panels) or circulation (bottom right panels) of each mouse. **F.** Representative flow plot showing tetramer staining of D<sup>b</sup>-PA<sup>+</sup> cells (Left) and percentages of total lung D<sup>b</sup>-PA<sup>+</sup> cells found in the parenchyma (top right panels) or circulation (bottom right panels) of each mouse. **G-H.** Quantitation of tetramer positive D<sup>b</sup>-NP (**G**) or D<sup>b</sup>-PA (**H**) CD44<sup>Hi</sup> CD8<sup>+</sup> memory T cells from the spleen. **I-M.** Young (CD45.1<sup>+</sup>) or aged (CD45.2<sup>+</sup>) mice were infected with PR8. At 5 weeks p.i., infected young or aged mice were parabiosed for 4 weeks. **I.** representative flow cytometry plot showing intravenous labeling with CD45 antibody and CD69 expression on lung CD8<sup>+</sup> T cells. **J, K.** Enumeration of circulating (**J.**) or CD69<sup>+</sup> parenchymal CD8 T cells (**K.**) from young or aged origin in each parabionts. **L, M.** Enumeration of D<sup>b</sup>-NP (**L**) or D<sup>b</sup>-PA (**M**) CD69<sup>+</sup> parenchymal CD8<sup>+</sup> T cells from young or aged origin in each parabionts. **A-F** was repeated twice with 3 pairs each and data was pooled. **I-M** was repeated twice with a total of 5 pairs and pooled. \* p<0.05 or not significant (ns) by Student's two-tailed t-test with unequal variance.

## Figure S4

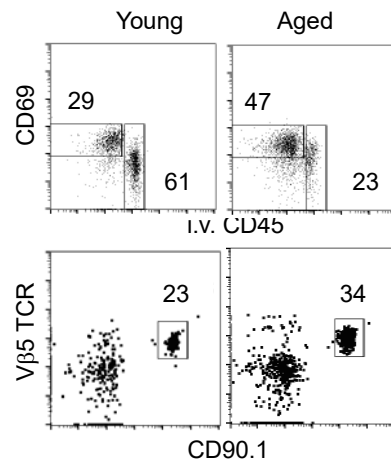

**Fig. S4. The accumulation of CD8<sup>+</sup> T<sub>RM</sub> in aged lungs is dependent on TGF-βR signaling.**

Wild type (Wt, CD45.1<sup>+</sup>) or *TGFβR2<sup>fl/fl</sup> dLck-Cre* OT-I cells (KO, CD45.1<sup>+</sup>) were adoptively transferred from young donors into separate young or aged hosts (CD45.2<sup>+</sup>) one day prior to PR8-OVA infection. Representative flow cytometry plots in lungs at 50 d.p.i., showing the gating strategy for resident OT-I T cells (CD8<sup>+</sup>CD69<sup>+</sup> i.v.CD45<sup>-</sup>Vβ5<sup>+</sup>CD90.1<sup>+</sup>).

Figure S5

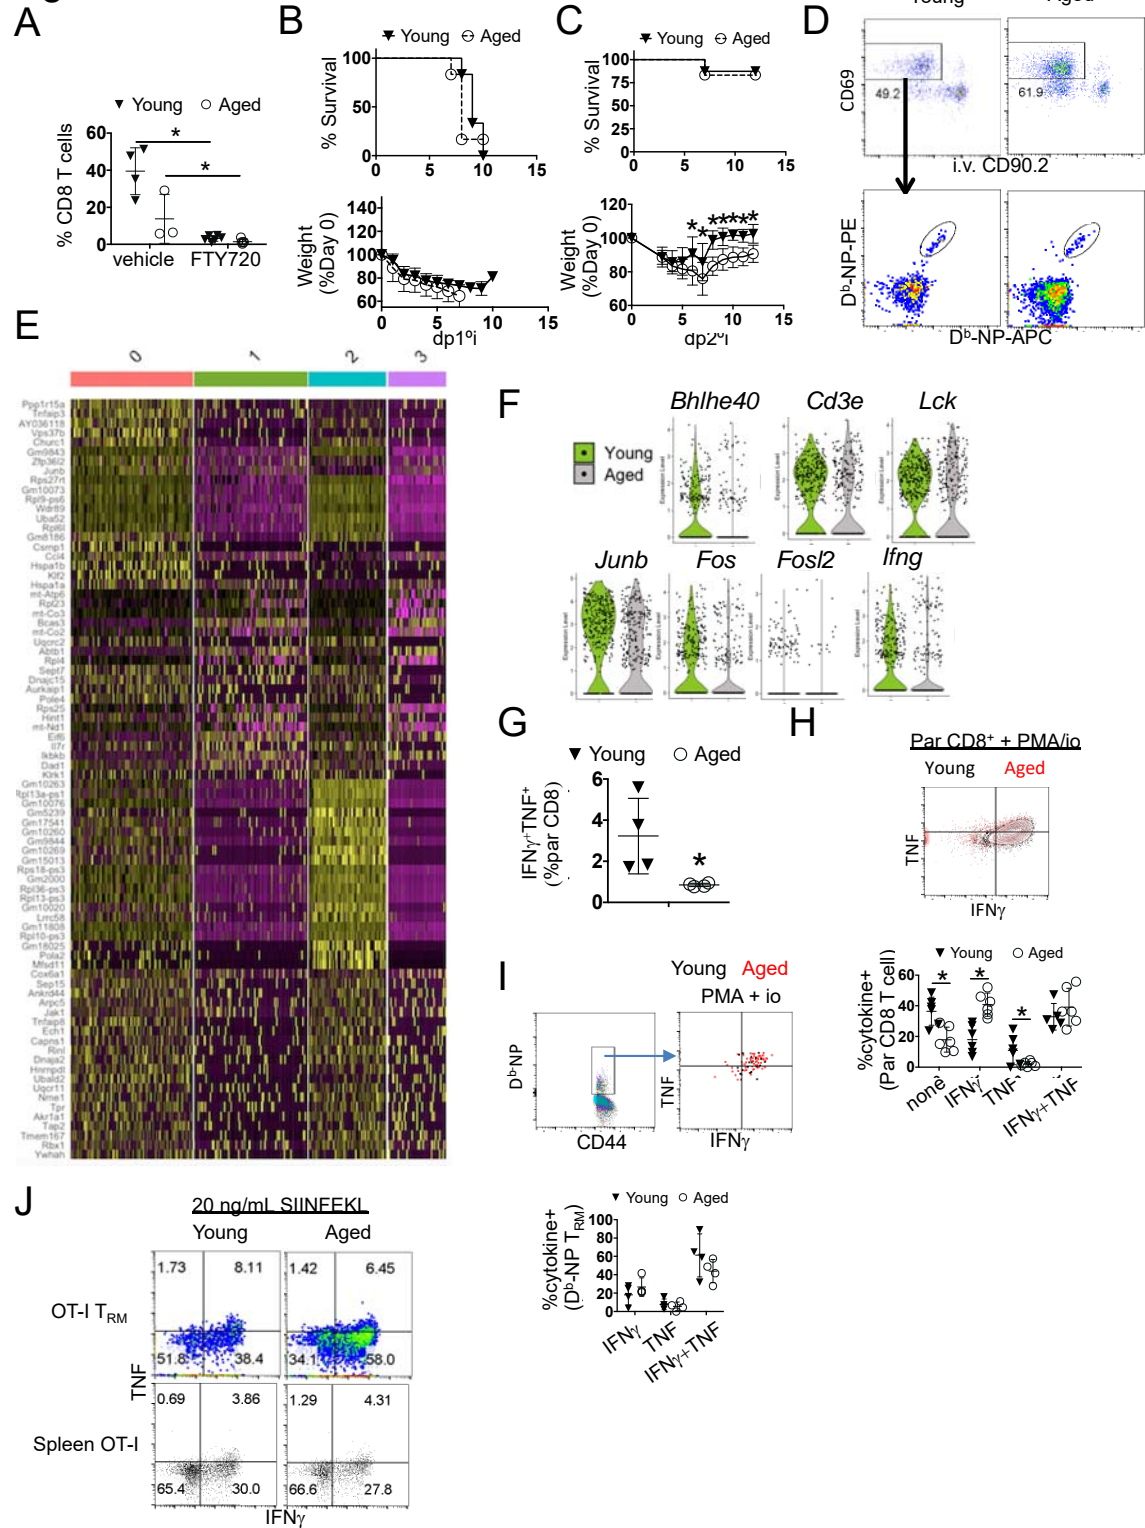

**Fig. S5. scRNA-seq on D<sup>b</sup>-NP T<sub>RM</sub> from young or aged lungs.**

**A.** Percent of peripheral blood CD8 T cells in CD45<sup>+</sup> white blood cells were evaluated 48 hours following FTY720 or vehicle treatment in young and aged memory mice. **B-C.** Survival (top) and weight loss (bottom) following lethal X31 infection of naive young or aged mice in the presence (B) or absence (C) of FTY720. **D.** Sorting scheme for D<sup>b</sup>-NP specific T<sub>RM</sub> cells. Following CD8 enrichment (Miltenyi

kit), CD44<sup>Hi</sup>CD69<sup>i.v.</sup>CD90.2<sup>-</sup>D<sup>b</sup>-NP-PE<sup>+</sup>/D<sup>b</sup>-NP-APC<sup>+</sup> cells were sorted from young (n=18) or aged (n=11) mice at 60 d.p.i. for scRNAseq. **E.** Heat map of top 20 DEGs by cluster for scRNA seq data. **F.** Violin plots of *Bhlhe40*, *Cd3e*, *Lck*, *Junb*, *Fos*, *Fosl2*, and *Ifng* expression in young or aged D<sup>b</sup>-NP T<sub>RM</sub> cells. **G.** Young or aged mice were infected with PR8. At 60 d.p.i., young lung cells were labeled with cell-proliferation dye and then mixed 1:1 with aged lung cells prior to stimulating for 5 hours with NP peptide. IFN- $\gamma$ <sup>+</sup>TNF<sup>+</sup> production by parenchymal CD8<sup>+</sup> T cells derived from young or aged lungs was measured. **H.** Representative plots (top) or percent (bottom) of IFN- $\gamma$ <sup>+</sup> TNF<sup>+</sup> lung-resident CD8<sup>+</sup> T cells following stimulation with PMA/Ionomycin at 60 d.p.i. **I** Representative plots (left) or percent of IFN- $\gamma$ <sup>+</sup> TNF<sup>+</sup> lung-resident CD8<sup>+</sup> D<sup>b</sup>-NP<sup>+</sup> T cells following stimulation with PMA/Ionomycin at 60 d.p.i. **J.** OT-I T cells (CD90.1<sup>+</sup>) from young donors were adoptively transferred into young or aged C57BL/6 mice 1 day prior to infection with PR8-OVA virus. Percent of IFN- $\gamma$ <sup>+</sup> TNF<sup>+</sup> lung-resident (top) or splenic (bottom) OT-I cells following stimulation with increasing amounts of SIINFEKL peptide at 50 d.p.i. **A & B** were single replicates. scRNAseq data (**D-F**) is from a sorted pool of 18 young or 11 aged mouse lungs. **G-J** were representative data from 2-3 replicates each. \* p<0.05 or not significant (ns) by Student's two-tailed t-test with unequal variance or Log-rank (Mantel-Cox) test for survival curve comparison (**B & C**).



Figure S6

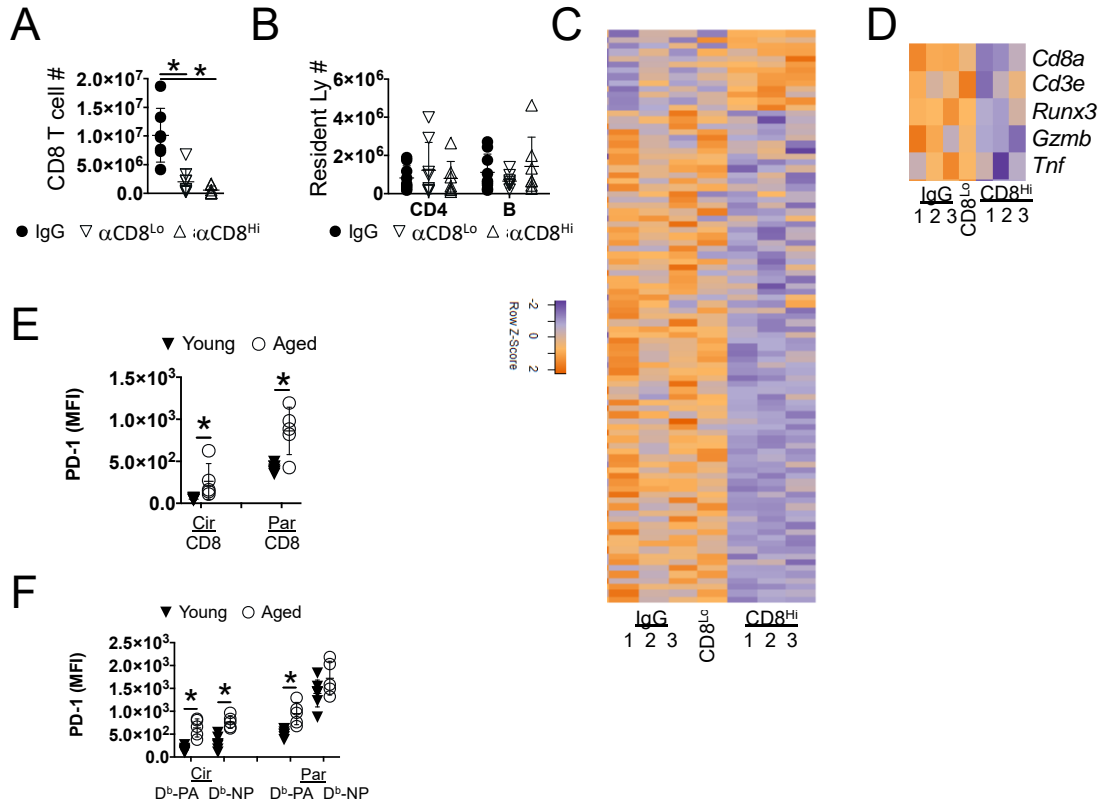

**Fig. S6. High dose of CD8 Ab treatment diminishes lung inflammatory responses.**

Aged or young C57BL/6 mice were infected with PR8. Mice received high or low dose of anti-CD8 treatment starting at day 21 as indicated. **A**. Splenic CD8<sup>+</sup> T cell numbers in aged mice following CD8 Ab treatment. **B**. Resident CD4 and B cells were quantitated in the lungs. **C**. Complete set of DEGs (1.5 fold) from Nanostring data. **D**. Select nanostring DEGs showing CD8-related gene depletion after high, but not low dose Ab treatment in aged mice at 60 d.p.i. **E-F**. PD-1 expression (MFI) was measured in young or aged lung circulating (Cir) or parenchymal (Par) CD8<sup>+</sup> T cells (**E**), or D<sup>b</sup>-NP and D<sup>b</sup>-PA influenza-specific CD8<sup>+</sup> T cells at 60 d.p.i. (**F**). **A & B** were 2 pooled experiments, **C & D** were a single experiment in triplicate or pooled from 3 mice ( $\alpha$ CD8<sup>Lo</sup>). **E & F** are representatives of 2 independent experiments. \*  $p < 0.05$  ANOVA with correction for multiple tests.
